# Supplementary material for: Validation of Reference Genes for Studying Different Abiotic Stresses in Oat (Avena sativa L.) by RT-qPCR
Source: MDPI journal article supplement (doi:10.3390/plants10071272), 2021-06-22
Supplement: s1 [file s1]

## Actin (ACT)

reference sequence: MF405765.1

forward primer: CGAGCGGGAAATTGTAAGGG

reverse primer: CGATCATGGATGGCTGGAAG

product size: 191 bp

contig number: CTG107765, percentage identity: 95%, E value: 0.00, Gaps (0/615)

|         |       |                                                               |       |
|---------|-------|---------------------------------------------------------------|-------|
| Query   | 454   | GGTATCGTTCTCGACTCTGGTGATGGTGTCTAGCCACACCGTGCCCATTTACGAAGGATAC | 513   |
|         |       |                                                               |       |
| Subject | 18164 | GGTATTGTTCTTGACTCTGGTGATGGTGTCTAGCCACACTGTGCCATCTATGAAGGATAC  | 18223 |
| Query   | 514   | GCGCTTCCTCATGCCATTCTTCGTTTGGATCTCGCTGGTCGGGATCTCACGGACTCCCTC  | 573   |
|         |       |                                                               |       |
| Subject | 18224 | GCGCTTCCTCACGCCATTCTTCGTTTGGATCTTGCTGGCCGTGATCTCACTGATTCTCTC  | 18283 |
| Query   | 574   | ATGAAGATCCTCACTGAGAGAGGTTACTCCTTCACAACCTCAGCCGAGCGGGAAATTGTA  | 633   |
|         |       |                                                               |       |
| Subject | 18284 | ATGAAGATTCTCACTGAGAGAGGTTACTCCTTCACAACCTCAGCCGAGCGGGAAATTGTA  | 18343 |
| Query   | 634   | AGGGACATCAAGGAGAAGCTTGCGTATGTTGCCCTTGATTATGAACAGGAGCTGGAGACT  | 693   |
|         |       |                                                               |       |
| Subject | 18344 | AGGGACATCAAGGAGAAGCTTGCGTACGTAGCCCTTGATTATGAACAAGAGCTGGAGACT  | 18403 |
| Query   | 694   | GCCAAGAACAGCTCCTCAGTTGAGAAGAGCTACGAGCTTCCTGATGGTCAGGTATCACG   | 753   |
|         |       |                                                               |       |
| Subject | 18404 | GCCAAGAACAGCTCCTCAGTTGAGAAGAGCTACGAGCTACCTGACGGTCAGGTATCACG   | 18463 |
| Query   | 754   | ATTGGCGCAGAGAGGTTCAAGGTGCCCTGAGGTCCTCTTCCAGCCATCCATGATCGGCATG | 813   |
|         |       |                                                               |       |
| Subject | 18464 | ATTGGCGCTGAGAGGTTCAAGGTGCCCTGAGGTCCTCTTCCAGCCATCCATGATCGGCATG | 18523 |
| Query   | 814   | GAGTCTTCTGGAATCCATGAGACGACCTACAACCTCCATCATGAAGTGTGACGTGGATATC | 873   |
|         |       |                                                               |       |
| Subject | 18524 | GAGTCTTCTGGAATCCATGAGACAACCTACAACCTCCATCATGAAGTGTGACGTGGATATC | 18583 |
| Query   | 874   | AGGAAGGACCTGTACGGCAACATTGTGCTCAGTGGTGGCACAACCTATGTTCCAGGTATC  | 933   |
|         |       |                                                               |       |
| Subject | 18584 | AGGAAGGACCTGTATGGCAACATTGTGCTCAGTGGAGGTACAACCATGTTCCAGGTATC   | 18643 |
| Query   | 934   | GCTGACCGTATGAGCAAGGAGATCACCGCGCTTGCTCCGAGCAGCATGAAGATCAAGGTT  | 993   |
|         |       |                                                               |       |
| Subject | 18644 | GCTGACCGTATGAGCAAGGAGATCACCGCGCTTGCTCCGAGCAGCATGAAGATCAAGGTT  | 18703 |
| Query   | 994   | GTCGCCCCACCTGAGAGGAAGTACAGTGTCTGGATCGGAGGGTCCATCCTAGCCTCACTC  | 1053  |
|         |       |                                                               |       |
| Subject | 18704 | GTTGCTCCTCCTGAGAGGAAGTACAGTGTCTGGATCGGAGGGTCCATTCTAGCCTCGCTC  | 18763 |
| Query   | 1054  | AGCACTTTCCAACAG                                               | 1068  |
|         |       |                                                               |       |
| Subject | 18764 | AGCACTTTCCAACAG                                               | 18778 |

oat sequence:

GGTATTGTTCTTGACTCTGGTGATGGTGTCTAGCCACACTGTGCCATCTATGAAGGATACGCGCTTCCTCACGCCATTCTTCGTTTGGATCTTG  
CTGGCCGTGATCTCACTGATTCTCTCATGAAGATTCTCACTGAGAGAGGTTACTCCTTCACAACCTCAGC CGAGCGGGAAATTGTAAGGG ACAT  
CAAGGAGAAGCTTGCGTACGTAGCCCTTGATTATGAACAAGAGCTGGAGACTSGCCAAGAACAGCTCCTCAGTTGAGAAGAGCTACGAGTACC  
TGACGGTCAGGTGATCAGATTGGCGCTGAGAGGTTCAAGTGCCCTGAGGTCCT TTCCAGCCATCCATGATCG CATGGAGTCTTCTGGAATC  
CATGAGACAACCTACAACCTCCATCATGAAGTGTGACGTGGATATCAGGAAGGACCTGTATGGCAACATTGTGCTCAGTGGAGGTACAACCATGT  
TCCCAGGTATCGCTGACCGTATGAGCAAGGAGATCACCGCGCTTGCTCCGAGCAGCATGAAGATCAAGGTTGTTGCTCCTCCTGAGAGGAAGTA  
CAGTGTCTGGATCGGAGGGTCCATTCTAGCCTCGCTCAGCACTTTCCAACAG

**Figure S5.** Actin sequence alignment and primer location

**reference sequence: U76558.1**

reverse primer: CCTCCTCCATGCCCTCAC

contig number: CTG25086, percentage identity: 93%, E value: 0.00, gaps (4/619)

oat sequence:

CAGGTTCATTTCATCGTTGACTGCTTCCTCGAGGTTTGATGGTGCTCTTAACGTTGATGTCAATGAGTTCCAGACCAATCTGGTGCCCTACCCAA  
GGATCCATCTCATGCTCTCTCTACGCCCCAGTGAATCTCTGCTGAGAAGGCTTACACGAGCAGCTCTCTGTGTGCTGAGATACCAACAGATGTC  
CTTTGAGCCTTCTCCATGATGGCCAAAGTCGACCCCGCCATGGCAAGTACATGGCTCTGCTGTCTGATGTACCGTGGTGATGTGGTGCCCAAG  
GATGTGAATGCTGTGGCCACATCAAGACCAAGCGCACTATCCAGTTGTGTGAGCATGGTGCCCACTGGCTTCAAGTGGCGGTATTCAACTACCA  
GCCACCCAGCGTTGTCCAGGTGGTGACTTGGCCAAAGGTCCAAGAGGCTGGTGTCATGATCTCCAACATCCACAGTGGTTGTGAAGGTTCTCTCCC  
GCATCGACCACAAGTTCGACCTGATGATGCAAAAGCGTGCTTTGTGCCACTGGTACGTGGCTGAGGTCATGAGAGGATATGAGAAAGTTGGTGCTGAG  
CCGTGAGGATCTTGCTGCCCTGGAGAAGGATATGAGAAAGTATGGTGCTGAG

**Figure S6.**  $\alpha$ -Tubulin sequence alignment and primer location

**Figure S7.**  $\alpha$ -Tubulin sequence alignment and primer location

**reference sequence:** KR029492.1

reverse primer: **TGCTGCTGGGAATGATGTTG**

product size: 131 bp

contig number: ctg108160, percentage identity:  $\geq 87\%$ , E value:  $\leq 6.38 \times 10^{-18}$

E value: 6.38\*10<sup>-18</sup>, percentage identity: 95%, gaps 0/61

Query 491 AGGTTATCAATGACAGGTTTGGCATTGTTGAGGGTTTGATGACCACAGTTCATGCCATGAC 551  
 |||  
 Subject 18579 AGGTTATCAATGACAAGTTTGGCATCGTTGAGGGTTTGATGACCACTGTTTCATGCCATGAC 18639

E value: 2.05\*10<sup>-27</sup>, Identity: 89%, gaps 3/104

Query 550 ACTGCAACCCAGAAGACTGTTGATGGTCCTTCCAGCAAGGACTGGAGAGGTGGAAGGGCT 609  
 |||||||  
 Subject 13442 ACAGCAACCCAGAAGACTGTTGATG-TCCCTCGAGCAAG-ACTGGAGAGGTGGAAGGGCT 13499

```

Query 610      GCCAGCTT-CAACATCATTTCCAAGCAGCACTGGTGCCGCAAAGG 652
               || ||||| ||||| ||||| ||||| ||||| ||||| |||||
Subject 13500  GCTAGCTTTCAACATCATTTCCCAGCAGCACTGGAGTGCTAAGG 13543

```

E value: 3.67\*10<sup>-39</sup>, Identity: 87%, gaps 4/145

Query 652 GCTGTTGGCAAGGTGCTCCAGAGCTTAA-CGGAAAGTTGACTGGAATGGCCTTCCGTGT 710  
 |||||  
 Subject 13670 GCTGTTGGCAAGGTGCTTCCAGCTCTTAACCGGAAAGTTGACCGGAATGGCCTTCCGTGT 13729

Query 711 TCCCACGTGTGATGTTTCTGTTGTTGATCTGACTGTTAGACTTGCGAAGCCAGCAACCTA 770  
 |||||  
 Subject 13730 CCCAACTGTGCGATGTTTCTGTT-TTGATCTGACCGTTAGACTTGAG-AGGCAGCCACCTA 13787

```

Query 771      TGATCAGATTAAGGCTGCTATCAAG 795
               ||| |||| |||| |||| ||||
Subject 13788  TGAGCAGATCAAGGCT-CGATCAAG 13811

```

oat sequence:

AGGTTATCAATGACAAAGTTTGGCATCGTTGAGGGTTTGATGACCACTGTTTCATGCCATGACACAGCAACCCAGAAGACTGTTGATGTCCCTCGA  
GCAAGACTGGAGAGGTGGAAGGGCTGCTAGCTTTCAACATCATTCCCAGCAGCACTGGAGCTGCTAAGGCTGTTGGCAAGGTGCTTCCAGTCCTTAAA  
CGAAAGAGTTGACCGGAATGGCCTTCCGTGTCCCAACTGTCGATGTTTCTGTTTGATCTGACCGTTAGACTTGAGAGGCAGCCACCTATGAGCAGATCAAGGCTCGA  
TCAAG

**Figure S8.** GAPDH sequence alignment and primer location

## Ubiquitin conjugating enzyme (UBC)

reference sequence: M62720.1

forward primer: CAAGCTGACCCTGCAATTCA

reverse primer: GGGCTCCACTGGTTCTGTA

product size: 135 bp

contig number: CTG29477, percentage identity:  $\geq 93\%$ , E value:  $\leq 1.74 \times 10^{-30}$

E value  $2.75 \times 10^{-34}$  Identities: 96% Gaps: 0/92

```
Query      132  AGGTACGTTCAAGCTGACCCTGCAATTCACAGAAGATTACCCCAACAAGCCACCAACTGT  191
          |||
Subject 65992 AGGTACGTTCAAGCTGACCCTGCAATTCACAGAAGATTATCCCAACAAACCACCAACTGT  65933

Query      192  TCGGTTTGTCTCAAGGATGTTTCACCCAAACANN  223
          |||
Subject 65932 TCGGTTTGTCTCAAGGATGTTTCACCCGAACA  65901
```

E value  $1.74 \times 10^{-30}$  Identities: 95% Gaps: 0/87

```
Query      226  TATGCAGATGGAAGCATCTGCTTGGACATCCTACAGAACCAGTGGAGCCCTATATATGAT  285
          |||
Subject 65783 TATGCAGATGGAAGCATCTGCTTGGATATCTTACAGAACCAGTGGAGCCCATATATGAT  65724

Query      286  GTTGCAGCAATATTGACCTCTATCCAG  312
          |||
Subject 65723 GTTGCAGCAATATTGACCTCTGTCCAG  65697
```

E value  $1.52 \times 10^{-37}$  Identities: 93% Gaps: 0/108

```
Query 310      CAGTCCCTGCTGTGCGACCCGAACCCGAATTCTCCTGCGAACTCTGAAGCAGCCAGAATG  369
          |||
Subject 65027 CAGTCCCTGCTGTGCGACCCGAATCCAAATTCTCCGGCGAACTCTGAAGCAGCCAGGATG  64968

Query      370  TACAGCGAGAACAAGCGCGAGTACAACCGCAAGGTTTCGTGAGGTCGTG  417
          ||
Subject 64967 TATAGCGAGAACAAGCGCGAGTACAACCGCAAAGTTCGTGAGATCGTG  64920
```

oat sequence:

AGGTACGTTCAAGCTGACCCTGCAATTCA CAGAAGATTATCCCAACAAACCACCAACTGTTCGGTTTGTCTCAAGGATGTTTCACCCGAACANN  
TATGCAGATGGAAGCATCTGCTTGGATATCTTACAGAACCAGTGGAGCCCATATATGATGTTGCAGCAATATTGACCTCTGTCCAGTCCCTGC  
TGTGCGACCCGAATCCAAATTCTCCGGCGAACTCTGAAGCAGCCAGGATGTATAGCGAGAACAAGCGCGAGTACAACCGCAAAGTTCGTGAGAT  
CGTG

**Figure S9.** UBC sequence alignment and primer location

## Translation Elongation Factor 1 alpha-subunit

reference sequence: M90077.2

forward primer **AAGGAGGCAGCCAACTTCA**

reverse primer **AGCTCAGCAAACCTTGACAGC**

122 bp

contig number: CTG31755

E value 0.00

Identities:: 92%

Gaps: 2/938

|         |       |                                                                |       |
|---------|-------|----------------------------------------------------------------|-------|
| Query   | 1     | AGATGGAGCGCCACCCTCCCAAGTACTCAAAGGCGCGTTATGAAGAAATTGTCAAGGAGG   | 60    |
|         |       |                                                                |       |
| Subject | 21225 | AGATGGATGCCACCCTCCCAAGTACTCGAAGGCACGTTATGAAGAAATTGTGAAGGAAG    | 21284 |
| Query   | 61    | TCTCTTCTTACCTGAAGAAGGTTCGGCTACAACCCTGACAAGGTTCCCTTCGTCCTCCATCT | 120   |
|         |       |                                                                |       |
| Subject | 21285 | TCTCTTCTTACCTGAAGAAGGTTCGGCTACAACCCTGACAAGGTGCCATTTGTCCTCCATCT | 21344 |
| Query   | 121   | CTGGGTTTGAGGGTGACAACATGATTGAGAGGTCCACCAACCTTGACTGGTACAAGGGCC   | 180   |
|         |       |                                                                |       |
| Subject | 21345 | CTGGGTTTGAGGGTGACAACATGATTGAGAGGTCAACCAACCTTGACTGGTACAAGGGCC   | 21404 |
| Query   | 181   | CAACCTTCTTGAGGCGCTTGACCAGATCAACGAGCCCAAGAGGCCCTCAGACAAGCCCC    | 240   |
|         |       |                                                                |       |
| Subject | 21405 | CCACTTGCCTTGAGGCGCTTGACCAGATCAACGAGCCCAAGAGGCCCTCAGACAAGCCCC   | 21464 |
| Query   | 241   | TCCGTCTTCCCTCCAGGACGTTTACAAGATTGGTGGCATTGGAAGTGTGCCTGTTGGCC    | 300   |
|         |       |                                                                |       |
| Subject | 21465 | TCCGTCTTCCCTCCAGGATGTTTACAAGATTGGTGGCATTGGAAGTGTGCCTGTTGGCC    | 21524 |
| Query   | 301   | GTGTTGAGACTGGTGTATCAAGCCTGGTATGGTGTACCTTTGGTCCCCTGGTCTGA       | 360   |
|         |       |                                                                |       |
| Subject | 21525 | GTGTTGAGACCGGTGTATCAAGCCTGGCATGGTGTACCTTTGGTCCAAGTGGTCTGA      | 21584 |
| Query   | 361   | CAACTGAGGTCAAGTCCGTTGAGATGCACCATGAGTCTCTCTGGAGGCGCTTCTGGTG     | 420   |
|         |       |                                                                |       |
| Subject | 21585 | CCACTGAGGTAAAGTCCGTTGAGATGCACCAAGGAGTCTCTCTGGAGGCGCTCCCTGGTG   | 21644 |
| Query   | 421   | ACAACGTTGGCTTCAATGTCAAGAATGTTGCCGTGAAGGATCTGAAGCGTGGTTTGTGTG   | 480   |
|         |       |                                                                |       |
| Subject | 21645 | ACAACGTCGGGTCAATGTCAAGAATGTTGCTGTGAAGGATCTGAAGCGTGGGTGTGTGG    | 21704 |
| Query   | 481   | CATCCAACCTCAAGGATGACCTGCCAAGGAGGAGCCAACTTCACTCCCAGGTATCA       | 540   |
|         |       |                                                                |       |
| Subject | 21705 | CGTCCAACCTCAAGGATGACCTGCCAAGGAGGAGCCAACTTCACTCCCAGGTATCA       | 21764 |
| Query   | 541   | TCATGAACCACCCTGGTCAGATTGGCAACGGCTACGCCCCAGTGTGGACTGCCACACCT    | 600   |
|         |       |                                                                |       |
| Subject | 21765 | TCATGAACCACCCTGGTCAGATAGGCAACGGCTATGCCCCAGTGTGGACTGCCACACTT    | 21824 |
| Query   | 601   | CGCACATTGCTGTCAAGTTTGTGAGCTGGTGACCAAGATCGACAGGCGATCTGGTAAGG    | 660   |
|         |       |                                                                |       |
| Subject | 21825 | CGCACATTGCTGTCAAGTTTGTGAGCTGGTGACCAAGATTGACAGACGATCTGGCAAGG    | 21884 |
| Query   | 661   | AGCTGGAGGCCCTGCCAAGTTCTCTCAAGAATGGTGATGCTGGCATAGTGAAGATGATTC   | 720   |
|         |       |                                                                |       |
| Subject | 21885 | AGATTGAGAAGGAGCCCAAGTTTCTGAAGAATGGTGATGCTGGGATAGTGAAGATGATTC   | 21944 |
| Query   | 721   | CCACCAAGCCCATGGTTGTGGAGACCTTTGCTACTTACCCACCTCTTGGTCGTTTGTCTG   | 780   |
|         |       |                                                                |       |
| Subject | 21945 | CCACCAAGCCCATGGTTGTGGAGACCTTTTCTACTTACCTCCTCTTGGTCGCTTTGTCTG   | 22004 |
| Query   | 781   | TCCGTGACATGAGGCAAACTGTGGCTGTTGGTGTCATCAAGGGTGTGGAGAAGAAGGACC   | 840   |
|         |       |                                                                |       |
| Subject | 22005 | TGCGTGACATGAGACAAACGGTTGCTGTTGGTGTCATCAAGGCCGTGGAGAAGAAGGACC   | 22064 |
| Query   | 841   | CAACCGCGCGCAAGGTGACCAAGGCTGCCATCAAGAAGAAATGAGGGGCTTACCTGAATC   | 900   |
|         |       |                                                                |       |
| Subject | 22065 | CTACCGTGCCAAGGTGACCAAGGCTGCTGCCAAGAAGAAATGAGGTGTTTACCT-TATC    | 22123 |
| Query   | 901   | CATCTATGCTCTGCTTTTGTAGAT-CTCTAGTAGTTTAGT                       | 937   |
|         |       |                                                                |       |
| Subject | 22124 | GTTCCATGCTCTGTTTGTAGATACCTAGTAGTTTGT                           | 22161 |

oat sequence:

AGATGGATGCCACCCTCCCAAGTACTCGAAGGCACGTTATGAAGAAATTGTGAAGGAAGTCTCTTCTTACCTGAAGAAGGTTGGCTACAACCCTGACAAGGTGCCATTTGTCCCCATCTCTGGG  
TTTGAGGGTGACAACATGATTGAGAGGTCAACCAACCTTGACTGGTACAAGGGCCCCACCTTGTCTGAGGCGCTTGACCAGATCAACGAGCCCAAGAGGGCCCTCAGACAAGCCCCCTCGTCTTCC  
CCTCCAGGATGTTTACAAGATTGGTGGCATTTGGAACCTGTGCCTGTTGGCCGTTTGAGACCGGTGTATCAAGCCTGGCATGGTTGTCACTTTGGTCCAACTGGTCTGACCACTGAGGTTAAGT  
CCGTTGAGATGCACCAAGTCTCTCTGGAGGCGCTCCCTGGTGACAACGTCGGGTTCAATGTCAAGAATGTTGCTGTGAAGGATCTCAAGCGTGGGTTTGTGGCGTCCAACTCCAAGGATGAC  
CCTGCA**AAGGAGGCAGCCAACTTCA**CTCCCAAGGTCAATCATGTAACCAACCTGGTCAGATAGGCAACGGCTATGCCCCAGTGTGGACTGCCACACTTCGCACATT**AGTGTCAAGTTTGTG**  
**AGT**GGTGACCAAGATTGACAGACGATCTGGCAAGGAGATTGAGAAGGAGCCCAAGTTTCTGAAGAATGGTGATGCTGGGATAGTGAAGATGATCCCAACCAAGCCCATGGTTGTGGAGACCTTTT  
CTACTTACCTTCTTGGTGGCTTGGTGGCTGACATGAGACAAACGGTTGCTGTTGGTGTCATCAAGGCCGTGGAGAAGAAGGACCTTACCGTGCCAAGGTGACCAAGGCTGCTGCCAAG  
AAGAAATGAGGTGTTTACCT-TATCGTTCCATGTCTGGTTTGTAGATACCTAGTAGTTTGT

**Figure S10.** EF1 sequence alignment and primer location

**Figure S11.** TBPII sequence alignment and primer location

## ADP-ribosylation factor (ADPR)

reference sequence: AB050957.1

forward primer: CTCATGGTTGGTCTCGATGC

reverse primer: ACATCCCAAACAGTGAAGCT

product size: 143 bp

contig number: CTG25287, percentage identity:  $\geq 92\%$ , E value:  $\leq 1.03 \times 10^{-22}$

E value:  $5.56 \times 10^{-64}$ , Identities: 97%, gaps 0/149

```
Query      1  ATGGGGCTCACGTTACCAAGCTGTTACGCCGCCTCTTCGCCAAGAAGGAGATGAGGATT  60
|||||
Subject 21896 ATGGGGCTCACGTTACCAAGCTGTTACGCCGCCTCTTCGCCAAGAAGGAGATGAGGATT  21955

Query      61  CTCATGGTTGGTCTCGATGCCGCTGGTAAGACCACCATCCTCTACAAGCTCAAGCTCGGA  120
|||||
Subject 21956 CTCATGGTTGGTCTCGATGCCGCTGGTAAGACCACCATCCTCTACAAGCTCAAGCTCGGC  22015

Query      121  GAGATCGTCACCACCATCCCAACCATCGG  149
|||||
Subject 22016 GAGATCGTCACCACCATCCCTACCATCGG  22044
```

E value:  $1.03 \times 10^{-22}$ , Identities: 92%, gaps 0/78

```
Query      148  GGATTCAACGTCGAAACTGTTGAATACAAGAACATCAGCTTCACTGTTTGGGATGTGGGG  207
|||||
Subject 22349 GGATTTAACGTCGAGACTGTCTGAATACAAGAACATCAGCTTCACTGTTTGGGATGTGGGG  22408

Query      208  GGCCAAGACAAGATCAGG  225
||
Subject 22409 GGTCAAGACAAGGTAAGG  22426
```

E value  $1.45 \times 10^{-45}$  Identities: 94% Gaps: 0/123

```
Query      218  AGATCAGGCCCTTGAGGCACTACTTCCAGAATACCAAGGGCTCATTGTTGTTGTTG  277
|||||
Subject 22602 AGATCAGGCCCTTGAGGCACTACTTCCAGAATACAGGGACTCATCTTTGTTGTTG  22661

Query      278  ACAGCAATGATAGGGAACGTGTTGTTGAGGCTAGAGATGAGCTCCACAGAATGCTGAATG  337
|||||
Subject 22662 ACAGCAATGATAGGGAGCGTGTTGTTGAGGCTAGAGATGAGCTCCACAGGATGCTGAATG  22721

Query      338  AGG  340
|||
Subject 22722 AGG  22724
```

E value  $1.89 \times 10^{-50}$  Identities: 96% Gaps: 0/124

```
Query      338  AGGATGAGCTGCGTGATGCTGTGTTGCTTGTATTGCAAACAAACAAGATCTTCCTAATG  397
|||||
Subject 22999 AGGATGAGCTACGTGATGCTGTGTTGCTTGTATTGCAAACAAACAAGATCTTCCCAATG  23058

Query      398  CCATGAATGCTGCTGAAATCACCGACAAGCTTGGTCTGCACTCCCTGCGCCAGCGGCACT  457
|||||
Subject 23059 CCATGAATGCGGCTGAAATCACTGACAAGCTTGGTCTGCACTCCCTGCGCCAGCGGCACT  23118

Query      458  GGTA  461
|||
Subject 23119 GGTA  23122
```

oat sequence:

ATGGGGCTCACGTTACCAAGCTGTTACGCCGCCTCTTCGCCAAGAAGGAGATGAGGATTCTCATGGTTGGTCTCGATGCGCTGGTAAGACCACCATCCTCTACAA  
GCTCAAGCTCGGCGAGATCGTCACCACCATCCCTACCATCGGATTTAACGTCGAGACTGTCTGAATACAAGAACATCAGCTTCACTGTTTGGGATGGGGGGTCAAG  
ACAAGATCAGGCCCCCTTTGGAGGCACTACTTCCAGAATACACAGGACTCATCTTTGTTGTTGACAGCAATGATAGGGAGCGTGTTGTTGAGGCTAGAGATGAGCTC  
CACAGGATGCTGAATGAGGATGAGCTACGTGATGCTGTGTTGCTTGTATTGCAAACAAACAAGATCTTCCCAATGCCATGAATGCGGCTGAAATCACTGACAAGCT  
TGGTCTGCACTCCCTGCGCCAGCGGCACTGGTA

**Figure S12.** ADPR sequence alignment and primer location



## Similar to phosphogluconate dehydrogenase (PGD)

reference sequence: Ta30797 (Unigene Cluster)

forward primer: **GCAAAGATGAAACTGGTGGTCA**

reverse primer: **CAACCCACTTTTGTCCGCC**

product size: 90 bp

contig number: CTG22048 percentage identity:  $\geq 90\%$ , E value:  $\leq 1.58 \times 10^{-28}$

E value  $1.06 \times 10^{-30}$  Identities: 90% Gaps: 0/103

```
Query      217  GTTGTTTTTCGACAAGGATGGCGTGCTCGAGCAAATCGGAGAGGGCAAGGGCTACGTGGAT  276
          |||
Subject 40058 GTTGTTTTTCGACAAGGATGGCGTGCTCGAGCAAATCGGGGAAGGGAAGGGCTATGTGGAC  39999

Query      277  ATGTCCACTGTTGATGCTGCAACTTCTTGCAAGATAAGCGAGG  319
          |||
Subject 39998 ATGTCCACCGTTGATGCCGCGACCTCTTGCAAGATAAGTGAGG  39956
```

E value  $7.16 \times 10^{-33}$  Identities: 91% Gaps: 0/105

```
Query      317  AGGCGGTTAAACAAAAGGGCGGAGCTTTTGTGAAGCTCCAGTTTCAGGGAGCAAGAAGC  376
          |||
Subject 39013 AGGCGGTTAAACAAAAGCTGGAGCTTTTGTGAAGCTCCAGTTTCAGGGAGCAAGAAGC  38954

Query      377  CAGCTGAAGATGGCCAATTGGTCATTCTTGCTGCAGGCGACAAGG  421
          |||
Subject 38953 CAGCTGAAGATGGTCAATTGGTTATTCTTGACAGAGGGACAAGG  38909
```

E value  $1.48 \times 10^{-41}$  Identities: 93% Gaps: 0/118

```
Query      419  AGGCACATATATGATGATATGGTCCCTGCATTTGATGTACTTGGAAGAAGTCATTCTTTC  478
          |||
Subject 37645 AGGCACATATATGACGACATGGTCCCTGCCTTTGATGTACTTGGAAGAAAGTCGTTCTTCT  37586

Query      479  TGGGGGAGATGGGAAATGGAGCAAAGATGAAACTGGTGGTCAACATGATCATGGGAAG  536
          |||
Subject 37585 TGGGGGAGATTGGGAAATGGAGCAAAGATGAAACTGGTGGTCAACATGATCATGGGAAG  37528
```

E value  $1.58 \times 10^{-28}$  Identities: 96% Gaps: 0/82

```
Query      535  AGTATGATGAATGCTTTTCTGAGGGACTCTGTTTGGCTGACAAAAGTGGGTTGAGCCCC  594
          |||
Subject 37031 AGTACGATGAATGCCTTTTCTGAGGGACTCTGTTTGGCGGACAAAAGTGGGTTGAGCCCC  36972

Query      595  CAGACGCTTCTTGATGTCCTGG  616
          |||
Subject 36971 CAGACGCTTCTTGATGTCCTGG  36950
```

oat sequence:

AGTGCGACGAGCTCGCCGCGCTGGGCGCTACCGTCGGGGACACGCCCCGGAAGGTCGTCGCCAAGTGCAACTACACCATCGCCATGCTCTCCGA  
TCCCAGCGCCGCGCTATCCGTTGTTTTTCGACAAGGATGGCGTGCTCGAGCAAATCGGGGAAGGGAAGGGCTATGTGGACATGTCCACCGTTGAT  
GCCGCGACCTCTTGCAAGATAAGTGAGGCAGTTAAACAGAAAGCTGGAGCTTTTGTGAAGCTCCAGTTTCAGGGAGCAAGAAGCCAGCTGAAG  
ATGGTCAATTGGTTATTCTTGACGAGGGGACAAGGCACTATATGACGACATGGTCCCTGCCTTTGATGTACTTGGGAAAAAGTCGTTCTTCTT  
GGGGGAGATTGGAAATGGA**GCAAAGATGAAACTGGTGGTCA**ACATGATCATGGGAAGTACGATGAATGCCTTTTCTGAGGGACTCTGTTT**GGCG**  
**GACAAAAGTGGGTTG**AGCCCCCAGACGCTTCTTGATGTCCTGG

**Figure S13.** PGD sequence alignment and primer location

## Phenylalanine ammonia lyase (PAL)

reference sequence: MT150275.1

forward primer: GCAACTTCCAGGGCACCC

reverse primer: CTCCGAGAACTGAGCGAACAT

product size: 95 bp

sequence identity: 91%, E-value: 0.00, gaps: 0/1683, contig number: CTG14153

```
Query      1  CAGGTTCCCTTAACGCCGGTGCCTTCGGAACGGACGGACGACAGTCTGCCCCCGCA  60
          ||| ||| ||| ||| ||| ||| ||| ||| ||| ||| ||| ||| ||| ||| |||
Subject 142817 CAGGTTCCCTCAACGCCGGTGCCTTCGGAACGGACGGACGACAGTCTGCCCCCGCA 142758

Query      61  GGCAACACGCGCGGCTATGCTCGTCCGCATCAACACCCTCCTCCAGGGTTACTCGGGCAT  120
          ||| ||| ||| ||| ||| ||| ||| ||| ||| ||| ||| ||| ||| |||
Subject 142757 GGCAACGCGCGCGGCCATGCTGGTCCGCATCAACACCCTCCTGCAGGGTTACTCGGGGAT 142698

Query     121  CCGCTTCGAGATCCTCGAGGCCATCACCAGCTGCTCAACGCCAATGTCACGCCGTGCTT  180
          ||| ||| ||| ||| ||| ||| ||| ||| ||| ||| ||| ||| ||| |||
Subject 142697 CCGCTTCGAGATCCTCGAGGCCATCACCAGCTGCTCAACGCCAAGTCAACCCCGTGCCT 142638

Query     181  GCCGCTCCGGGGACCATCACTGCATCCGGTGACCTTGTGCCGTGTCTTACATTGCCGG  240
          ||| ||| ||| ||| ||| ||| ||| ||| ||| ||| ||| ||| ||| |||
Subject 142637 GCCGCTCCGGGGACCATCACCAGCTCGGGCGACCTGCTGCCGTCTCTCTTACATTGCCGG 142578

Query     241  CCTTATCACCGGCCGACAGAATCTGTTGCGGTGGCCCTGATGGCAGCAAGGTGACCGC  300
          ||| ||| ||| ||| ||| ||| ||| ||| ||| ||| ||| ||| ||| |||
Subject 142577 CCTTATCACCGGTCGCCAGAACTCCGTGCGCGTGGCCCGATGGCAGCAAGGTGACCGC 142518

Query     301  TGCCGAGGCATTCAAGATCGCCGGGATCGAGCACGGTTCTTTGAGTGCAGCCCAAGGA  360
          ||| ||| ||| ||| ||| ||| ||| ||| ||| ||| ||| ||| ||| |||
Subject 142517 TGCCGAGGCGTTCAAGATCGCCGGCATCGAGCACGGTTCTTTGAGTGCAGCCCAAGGA 142458

Query     361  GGGCCTTGCCATGGTGAACGGCACGGCTGTGGGCTCTGGTCTTGTCATCGACCGTGCTCTT  420
          ||| ||| ||| ||| ||| ||| ||| ||| ||| ||| ||| ||| ||| |||
Subject 142457 AGGCCTTGCCATGGTGAACGGGACAGCGTGGGGTTCGGGACTTGCGTCGACCGTGCTGTT 142398

Query     421  TGAGGCCAATGTCTCTCGTCCTTGTGAGGTCTTGTCTGCGGTGTTCTGCGAGGTGAT  480
          ||| ||| ||| ||| ||| ||| ||| ||| ||| ||| ||| ||| ||| |||
Subject 142397 TGAGGCCAACATCTCGCCATACTCGCTGAGGTCTGTCGCGGTCTTCTGCGAGGTGAT 142338

Query     481  GAACGGCAAGCCGGAGTTCACTGACCACCTGACCCACAAGCTGAAGCACCACCTGGACA  540
          ||| ||| ||| ||| ||| ||| ||| ||| ||| ||| ||| ||| ||| |||
Subject 142337 GACCGGCAAGCCGGAGTTACGAGCACCTGACCCACAAGCTGAAGCACCACCTGGGCA 142278

Query     541  GATTGAAGCAGCTGCAATCATGGAGCACATCTTGGAGGGGAAGCTCATACATGAAGCAGGC  600
          ||| ||| ||| ||| ||| ||| ||| ||| ||| ||| ||| ||| ||| |||
Subject 142277 GATCGAGGCGGGCGGATCATGGAGCACATCTTGAAGGGAGCTCGTACATGAAGCAGGC 142218

Query     601  AAAGAAGCTTGCGGAGCTCGACCCCTTGATGAAGCCGAAGCAGGACCGGTATGCCCTCCG  660
          ||| ||| ||| ||| ||| ||| ||| ||| ||| ||| ||| ||| ||| |||
Subject 142217 CAAGATACAGGGCGAGCTCGACCCCGTGTGAAGCCGAAGCAGGACCGGTACGCGCTCCG 142158

Query     661  CACTTCGCCTCAGTGGCTCGGCCACAAATCGAAGTTATTTCGATTTGCCACCAAGTCGAT  720
          ||| ||| ||| ||| ||| ||| ||| ||| ||| ||| ||| ||| ||| |||
Subject 142157 CACGTGCGCGAGTGGCTTGCCCTCAGATCGAGGTTATCCGCTTCGCCACCAAGTCGAT 142098

Query     721  TGAGCGTGAGATCAACTCTGTCAACGACAACCCGCTCATCGAGCTCTCCCGTGGCAAGGC  780
          ||| ||| ||| ||| ||| ||| ||| ||| ||| ||| ||| ||| ||| |||
Subject 142097 CGAGCGGAGATCAACTCCGTCAACGACAACCCGCTCATCGATGTCTCCCGTGGCAAGGC 142038

Query     781  CATCCACGGTGGCAACTTCCAAGGCACCCCATTTGGTGTCTCCATGGACAACACCCGCCT  840
          ||| ||| ||| ||| ||| ||| ||| ||| ||| ||| ||| ||| ||| |||
Subject 142037 GATCCATGGGGGCAACTTCCAGGGCACCCCATCGGTGTCTCCATGGACAACACCCGCCT 141978

Query     841  CGCCATTGTGTGCTATTGGCAAGCTGATGTTTCGCGCAGTTCTCGGAGCTCGTGAACGACTT  900
          ||| ||| ||| ||| ||| ||| ||| ||| ||| ||| ||| ||| ||| |||
Subject 141977 TGCCATCGCTGCTATTGGCAAGCTGATGTTTCGCGCAGTTCTCGGAGCTGGTGAACGACTT 141918

Query     901  CTACAACATGGCCTGCCTTCCAACCTGTCCGGTGGGCGCAACCCGAGCTTGGACTATGG  960
          ||| ||| ||| ||| ||| ||| ||| ||| ||| ||| ||| ||| ||| |||
Subject 141917 CTACAACAACGGCCTCCCGTCCAACCTGTCCGGTGGGCGCAACCCGAGCTTGGACTACGG 141858
```

oat sequence:

```
CAGGTTCCCTCAACGCCGGTGCCTTCGGAACGGACGGACGACAGTCTGCGGGCCGAGGCAACGCGCGCCGCCATGCTGGTCCGCATCAACACCCTCCTGCAGG
GTTACTCGGGGATCCGCTTCGAGATCCTCGAGGCCATCACCAGCTGCTCAACGCCAAGCTCACCCTGCTCCCGCTCCGGGGGACCATCACCCTCGGGCGAC
CTCGTGCCGCTCTCTACATTGCGGGCTTATCACCCTCGCCAGAACTCCGTCGCGCTGGCCCCGATGGCAGCAAGGTGACCGCTGCCGAGGCGTTCAAGATCGC
CGGCATCGAGCACGGGTTCTTTGAGCTGCAGCCCAAGGAAGGCTTGCCATGGTGAACGGACAGCCGTGGGGTCCGGACTTGCGTCGACCGTGTGTTGAGGCCA
ACATCCTCGCCATACTCGCTGAGGTCTGTCGCGGTCTTCTGCGAGGTGATGACCGGCAAGCCGAGTTTACGGACCACTGACCCACAAGCTGAAGCACCACCT
GGGCAGATCGAGGCGGCGCGATCATGGAGCACATCTTGAAGGGAGCTCGTACATGAAGCAGGCCAAGATACAGGGCGAGCTCGACCCGCTGATGAAGCCGAAGCA
GGACCGGTACGCGCTCCGCACGTCCGCGAGTGGCTTGCCCTCAGATCGAGGTTATCCGCTTCGCCACCAAGTCGATCGAGCGCGAGATCAACTCCGTCAACGACA
ACCCGCTCATCGATGTCTCCCGTGGCAAGGCGATCCATGGGGGCAACTTCCAGGGCACCCCATCGGTGTCTCCATGGACAACACCCGCCTTGGCCATCGTGTCTATT
GGCAAGCTCAGTGTTCGCGCAGTTCTCGGAGCTGGTGAACGACTTCTACAACAACGGCCTCCCGTCCAACCTGTCCGGTGGGCGCAACCCGAGCTTGGACTACGG
```

Figure S14. PAL sequence alignment and primer location
