# Supplementary material for: Validation of Reference Genes for Studying Different Abiotic Stresses in Oat (Avena sativa L.) by RT-qPCR
Source: MDPI journal article supplement (doi:10.3390/plants10071272), 2021-06-22
Supplement: s1 [file s1]

**Table S1.** Sequence homology between wheat (NCBI GeneBank) and the corresponding oat (*Avena sativa* L.) sequences (Bioproject 541449)

| Gene Abbreviation | Accession No. (NCBI)         | Percentage of Identity | E value                   | Contig number (BioProject 541449) |
|-------------------|------------------------------|------------------------|---------------------------|-----------------------------------|
| ACT               | MF405765.1                   | 95%                    | 0.00                      | CTG107765                         |
| TUB               | U76558.1                     | 93%                    | 0.00                      | CTG25086                          |
| CYP               | EU035525.1                   | 92%                    | 0.00                      | CTG81232                          |
| GAPDH             | KR029492.1                   | ≥87%                   | ≤6.38*10 <sup>-18</sup>   | CTG108160                         |
| UBC               | M62720.1                     | ≥93%                   | ≤1.74 x 10 <sup>-30</sup> | CTG29477                          |
| EF1               | M90077.2                     | 92%                    | 0.00                      | CTG31755                          |
| TBP               | L07604.1                     | ≥90%                   | ≤5.56*10 <sup>-07</sup>   | CTG9379                           |
| ADPR              | Ta2291<br>(Unigene cluster)  | ≥92%                   | 1.03 x 10 <sup>-22</sup>  | CTG25287                          |
| PGD               | Ta30797<br>(Unigene cluster) | ≥90%                   | ≤1.58 × 10 <sup>-28</sup> | CTG22048                          |
| PAL               | MT150275.1                   | 91%                    | 0.00                      | CTG14153                          |
